# Supplementary material for: A rare coding mutation in the MAST2 gene causes venous thrombosis in a French family with unexplained thrombophilia: The Breizh MAST2 Arg89Gln variant
Source: PLoS Genet. 2021 Jan 19;17(1):e1009284. doi: 10.1371/journal.pgen.1009284 (PMC7846112; doi:10.1371/journal.pgen.1009284)
Supplement: S1 Data — (XLSX) [file pgen.1009284.s005.xlsx]

## Sheet: Fig 2
S5 Table
Data underlying Figures 2, 3C, 4, 5 and 7
			sample size	mean	SD	SE	p-value
Fig 2	TFPI plasma levels (ng/mL)	Cases	3	6.6	3.3	1.9	<0.01
	TFPI plasma levels (ng/mL)	Controls	7	17.4	3.2	1.2
	SerpinE1 plasma levels (UI/mL)	Cases	3	21.7	10.7	6.1	<0.01
	SerpinE1 plasma levels (UI/mL)	Controls	7	3.3	1.2	0.7
	UPA plasma levels (ng/mL)	Cases	3	0.81	0.33	0.19	0.99
	UPA plasma levels (ng/mL)	Controls	7	1.13	1.19	0.45
	ECLT in plasma (Min)	Cases	3	1200	300	173	<0.05
	ECLT in plasma (Min)	Controls	7	458	90	34
Raw data
TFPI (ng/ml)			SerpinE1 (UI/ml)			UPA (ng/ml)			ECLT (Min)
Cases	Controls		Cases	Controls		Cases	Controls		Cases	Controls
7.4	17.2		15	1		0.72	0.62		900	585
2.9	17.7		16	4		0.53	0.89		1500	540
9.5	15.1		34	1		1.17	3.8		1200	310
	17.1			2			0.5			420
	21.9			4			0.69			480
	20.7			5			0.85			420
	12.3			6			0.55			450

## Sheet: Fig 3C
			sample size	mean	SD	SE	p-value
Fig 3C	MAST2	si-cont	8	1	0.04996	0.01766	<0.0001
	MAST2	si-MAST2	8	0.2755	0.1107	0.03913
	RHBDL2	si-cont	6	1	0.1739	0.07101	<0.0001
	RHBDL2	si-MAST2	6	0.182	0.04126	0.01684
	HIST1	si-cont	6	1	0.2009	0.08201	<0.0001
	HIST1	si-MAST2	6	2.113	0.2052	0.08378
	TFPIa	si-cont	6	1	0.06019	0.02128	<0.0001
	TFPIa	si-MAST2	6	1.523	0.1088	0.04441
	TFPIb	si-cont	6	1	0.1879	0.06642	<0.0001
	TFPIb	si-MAST2	6	1.671	0.184	0.07513
	SERPINE1	si-cont	8	1	0.08857	0.03131	<0.0001
	SERPINE1	si-MAST2	8	0.4084	0.09384	0.03318
	PLAU	si-cont	6	1	0.03563	0.01454	<0.0001
	PLAU	si-MAST2	6	0.2086	0.07111	0.02903
	PLAT	si-cont	8	1	0.07065	0.02498	<0.0001
	PLAT	si-MAST2	8	0.697	0.1209	0.04276
	THBD	si-cont	6	1	0.08681	0.03544	0.0886
	THBD	si-MAST2	6	1.097	0.09599	0.03919
	SERPINB8	si-cont	6	1	0.07515	0.03068	<0.0001
	SERPINB8	si-MAST2	6	0.3785	0.04304	0.01757
Raw data
si-cont	si-MAST2	si-cont	si-MAST2	si-cont	si-MAST2	si-cont	si-MAST2	si-cont	si-MAST2	si-cont	si-MAST2	si-cont	si-MAST2	si-cont	si-MAST2	si-cont	si-MAST2	si-cont	si-MAST2
MAST2	MAST2	RHBDL2	RHBDL2	HIST1	HIST1	TFPIa	TFPIa	TFPIb	TFPIb	SERPINE1	SERPINE1	PLAU	PLAU	PLAT	PLAT	THBD	THBD	SERPINB8	SERPINB8
1.07674	0.217135	0.893601	0.135948	1.2842	2.24096	1.06437	1.33793	1.31343	1.97703	1.16743	0.385107	1.05214	0.285851	0.993093	0.539614	1.12117	0.955945	1.09206	0.426824
0.97716	0.2477	0.953983	0.214888	0.933218	1.96331	1.00696	1.61328	0.915945	1.54399	0.941696	0.454809	0.988514	0.261219	1.05702	0.624165	0.954842	1.08298	0.937657	0.417025
0.950439	0.224793	1.17695	0.189997	0.794492	2.36449	0.933033	1.59107	0.831238	1.77358	0.909618	0.427304	0.961483	0.268563	0.952638	0.578344	0.903335	1.24258	0.977163	0.391513
1.03766	0.163044	0.873257	0.204484	1.15783	2.12361	0.99539	1.50873	1.0693	1.53333	1.04488	0.300062	1.01866	0.122145	0.959264	0.619854	0.968171	1.04488	0.936303	0.311013
0.99539	0.142925	1.29715	0.221414	1.04735	2.1913	0.974905	1.61702	1.04729	1.5	0.928731	0.33064	1.01866	0.165702	0.946058	0.852635	1.08925	1.1355	1.10198	0.372509
0.968171	0.416162	0.930869	0.125547	0.782906	1.79317	1.03049	1.46747	0.89296	1.7	1.03049	0.306367	0.963707	0.148308	1.1019	0.817902	0.948246	1.12117	0.969477	0.35233
1.05704	0.395059					1.09162		1.24217		1.06272	0.538745			1.0887	0.805256
0.94608	0.396794					0.917935		0.80545		0.941323	0.524177			0.918662	0.738503

## Sheet: Fig 5
			sample size	mean	SD	SE	p-value
Fig 5A	MAST mRNA levels	ev	4	1	0.05239	0.02619
		MAST2	4	20.21	2.373	1.187	0.028
		MAST2 89Gln	4	18.9	1.462	0.7312	0.028
Raw data
ev	MAST2	MAST2 89Gln
0.99654	20.8938	18.7004
1.00347	19.6302	21
1.00347	23	18.1891
1.10573	17.3276	17.6917
			sample size	mean	SD	SE	p-value
Fig 5B	SERPINE1 ELISA	ev	4	0.4165	0.0347	0.01735
	SERPINE1 ELISA	MAST2	8	0.426	0.02377	0.008504	0.003
	SERPINE1 ELISA	MAST2 89Gln	8	0.4865	0.04004	0.01416
Raw data
ev	MAST2	MAST2 89Gln
0.405	0.454702	0.487794
0.456	0.387873	0.448161
0.375	0.445747	0.452323
0.43	0.431733	0.435199
	0.39378	0.489461
	0.431565	0.551322
	0.439379	0.524695
	0.423376	0.50328

## Sheet: Fig 6
			sample size	mean	SD	SE	p-value
Fig 6B	TFPI promoter	si-cont	6	1	0.1544	0.06303	0.0087
	TFPI promoter	si-MAST2	6	1.381	0.19	0.07755
	SERPINE1 promoter	si-cont	6	1	0.0485	0.0198	0.0022
	SERPINE1 promoter	si-MAST2	6	0.6085	0.1194	0.04875
Raw data
TFPI promoter			SerpinE1 promoter
si-cont	si-MAST2		si-cont	si-MAST2
0.825034	1.12873		1.0736	0.468274
1.02349	1.5		0.993655	0.479695
1.15148	1.64279		1.00888	0.571066
0.838983	1.2		0.951777	0.692893
1.19492	1.41217		0.944162	0.75
0.966102	1.4		1.02792	0.689086
			sample size	mean	SD	SE	p-value
Fig 6D	TFPI promoter	MAST2	9	1	0.05517	0.01839	<0.0001
	TFPI promoter	MAST2 89Gln	9	0.818	0.06901	0.023
	SERPINE1 promoter	MAST2	6	1	0.1695	0.0692	0.0022
	SERPINE1 promoter	MAST2 89Gln	6	1.534	0.1431	0.05844
Raw data
TFPI promoter			SERPINE1 promoter
MAST2	MAST2 89Gln		MAST2	MAST2 89Gln
1.0624	0.878821		1.20596	1.51117
0.999259	0.842347		1.05707	1.54839
0.941712	0.745439		0.736973	1.3
0.974646	0.894253		1.03207	1.72013
1.02501	0.791821		1.10066	1.63605
1.01841	0.888599		0.867264	1.49029
1.02086	0.846977
1.07945	0.697857
0.906236	0.775768

## Sheet: Fig 7
			sample size	mean	SD	SE	p-value
Fig 7B	PTEN/b-actin	ev	4	1	0.1023	0.05117
	PTEN/b-actin	MAST2	4	1.106	0.1373	0.06867	0.8857
	PTEN/b-actin	MAST2 89Gln	4	1.107	0.2457	0.1229
Raw data
PTEN/b-actin
ev	MAST2	MAST2 89Gln
1.01105	0.768558	0.90421
0.988945	0.702089	0.947733
1.01725	0.690771	1.04754
0.982746	0.75048	1.13525
			sample size	mean	SD	SE	p-value
Fig 7C	pAKT/AKT	ev	4	1	0.01673	0.008366
	pAKT/AKT	MAST2	4	0.728	0.03745	0.01873	0.0286
	pAKT/AKT	MAST2 89Gln	4	1.009	0.1035	0.05177
Raw data
pAKT/AKT
ev	MAST2	MAST2 89Gln
0.912817	1.16424	1.23708
1.08718	1.27114	1.38829
0.909959	1.01464	0.923366
1.09004	0.973422	0.880379
